# Supplementary material for: A New Integrated Approach to Taxonomy: The Fusion of Molecular and Morphological Systematics with Type Material in Benthic Foraminifera
Source: PLoS One. 2016 Jul 7;11(7):e0158754. doi: 10.1371/journal.pone.0158754 (PMC4936703; doi:10.1371/journal.pone.0158754)
Supplement: S2 Table — (XLSX) [file pone.0158754.s002.xlsx]

## Sheet: Sheet1
Specimen	Genetic type/ Type material	Maximum test diameter	Maximum width of penultimate chamber (Chamber N1) / Maximum test diameter	Average septal bar height (Chamber N1)	Average ratio of septal bar width/ Width of rest of chamber (Chamber N1)	Ratio of width of the sutural furrows at the umbilical region / Width of sutural furrow at periphery of the test (Chamber N1)	Sutural angle along the interseptal space between chambers N1 and N2	Total number of chambers / Maximum test diameter	Total number of septal pits / Maximum test diameter	Foraminiferal test roundness	Average septal pit roundness	Relative proportion of septal pit area to the area of the rest of the test	Number of umbilical bosses / Maximum test diameter	Porosity (Strength)	Degree of apertural ornamentation	Degree of openness of umbilical area	Degree of ornamentation within the sutures
Variable number		1	2	3	4	5	6	7	8	9	10	11	12	13	14	15	16		Genetic type/ type material
IMAGE002_SA05	1	433.33	0.270925	9.23	0.48	1.9285	44.9	0.0300002	0.24231	0.84	0.33	0.16	0	1	3	4	4		1	Elphidiid S1
IMAGE007_SA09	1	379.69	0.275804	8.96	0.52	3.2529	34.1	0.028971	0.194896	0.88	0.36	0.19	0	1	4	4	3		4	Elphidiid S4
IMAGE009_SA011	1	339.44	0.358208	8.58	0.67	3.5966	40.6	0.0382984	0.091327	0.83	0.39	0.21	0.002946	1	3	4	3		5	Elphidiid S5
IMAGE010_SA12	1	179.34	0.351288	8.76	0.4	1.4117	37	0.05576	0.468384	0.83	0.42	0.15	0	1	4	4	3		6	P. umbilicatula syntypes
IMAGE011_SA13	1	394.31	0.322462	6.79	0.72	2.7266	26.6	0.0278968	0.240927	0.87	0.37	0.21	0	1	4	4	3		7	E. williamsoni paratypes
IMAGE012_SA14	1	442.2	0.282768	13.02	1.85	2.3255	41.6	0.027137	0.178652	0.84	0.35	0.21	0	1	4	4	3		8	Topotypes (non sequenced)
IMAGE036_IS243	1	509.21	0.26331	11.17	0.575	2.8211	57.7	0.0176744	0.102119	0.88	0.42	0.09	0	1	0	3	2		9	Topotypes (sequenced)
IMAGE050_Is255	1	383.93	0.362227	12.86	0.55	3.0778	44.9	0.0260464	0.143255	0.86	0.41	0.17	0	1	0	3	2		10	E. williamsoni holotype
IMAGE051_Is151	1	310.53	0.344959	13.33	0.53	4.0318	57.1	0.0257624	0.148134	0.82	0.5	0.15	0	1	4	3	2
IMAGE052_Is257	1	404.46	0.295653	9.11	0.4	0.9877	55.4	0.0247243	0.185432	0.77	0.51	0.12	0	1	2	3	1
IMAGE059_SA61	1	360.16	0.371724	11.18	0.89	4.2284	28.1	0.0333185	0.136051	0.86	0.35	0.15	0	1	3	4	3
IMAGE133_CD273	1	344.34	0.298136	12.04	0.44	3.9026	58.2	0.0232329	0.078411	0.84	0.5	0.17	0	1	3	4	2
IMAGE135_CD275	1	243.93	0.327963	11.8	0.4	1.2522	46.1	0.0204977	0.303366	0.79	0.59	0.14	0.0040995	1	4	4	3
IMAGE152_Is103	1	376.81	0.350548	8.42	0.63	1.4361	27.1	0.0291924	0.236193	0.89	0.37	0.13	0	1	4	5	5
IMAGE158_Is109	1	505.68	0.270507	12.58	0.76	2.5111	32.1	0.0197754	0.239282	0.92	0.3	0.19	0	1	4	5	4
Image181_Is133	1	474.77	0.226762	13.28	0.71	3.1015	33.7	0.0315942	0.139015	0.86	0.37	0.14	0	1	3	4	3
IMAGE188_Is140	1	387.47	0.280693	11.87	0.67	3.5384	77	0.033551	0.343252	0.81	0.49	0.13	0	1	4	5	4
IMAGE195_Is147	1	477.42	0.33015	9.8	0.95	2.032	59.2	0.0272297	0.201081	0.85	0.26	0.15	0	1	4	5	3
Image197_Is149	1	428.36	0.281072	12.4	0.73	2.1968	14.1	0.0280138	0.242786	0.9	0.43	0.15	0	1	3	5	4
Image198_Is150	1	467.66	0.14842	13.76	0.6	2.2622	82.3	0.027798	0.230937	0.86	0.53	0.14	0	1	0	3	2
IMAGE199_Is152	1	474.02	0.93129	12.19	0.46	5.6206	19.3	0.0295346	0.229948	0.83	0.46	0.13	0	1	0	4	2
Image200_Is153	1	436.46	0.253494	12.26	0.47	4.664	19.5	0.0320763	0.167255	0.86	0.39	0.13	0	1	3	4	2
IMAGE201_NU107	1	377.42	0.266388	11.63	0.77	2.8001	59.1	0.0264957	0.198718	0.8	0.35	0.17	0.0079487	1	4	4	3
IMAGE205_Is157	1	379.66	0.315783	10.88	0.55	0.5203	31.7	0.0316072	0.23442	0.87	0.41	0.19	0	1	3	5	3
IMAGE206_Is158	1	425.64	0.283502	8.8	0.86	2.5224	15.9	0.0281928	0.260784	0.86	0.37	0.17	0	1	4	5	3
IMAGE207_Is159	1	418.78	0.290845	9.73	0.51	3.6168	32.3	0.0358183	0.100291	0.87	0.38	0.14	0	1	3	3	3
Image220_Nu122	1	250.28	0.293471	10.58	0.6	4.0205	57.7	0.0439508	0.083906	0.84	0.45	0.17	0	1	3	3	2
IMAGE223_Nu125	1	165	0.299212	8.25	0.49	2.5693	70.5	0.0484848	0.321212	0.8	0.48	0.19	0.0060606	1	4	3	3
IMAGE225_NU127	1	337.79	0.314012	9.36	0.64	3.0374	39.9	0.0296042	0.304923	0.71	0.45	0.18	0	1	4	5	4
Image227_NU129(2)	1	310.37	0.327802	11.77	0.67	4.0067	23.4	0.0418855	0.273867	0.88	0.36	0.2	0.003222	1	4	4	3
Image228_Nu130	1	208.77	0.364947	9.46	0.41	4.8085	27.6	0.0526896	0.277818	0.76	0.41	0.17	0	1	4	4	3
IMAGE233_NU135	1	332.52	0.265037	10.1	0.53	9.9842	53.7	0.0240587	0.09022	0.9	2.02	0.16	0	1	3	4	3
IMAGE235_Nu137	1	238.07	0.417062	9.91	0.61	3.7399	34.2	0.0462049	0.256227	0.8	0.47	0.19	0	1	4	3	3
Image236_Nu138	1	404.88	0.24017	13.27	0.43	4.698	36.3	0.0246987	0.093855	0.73	0.44	0.15	0	1	3	3	3
Image237_Nu139	1	383.81	0.277455	11.3	0.79	11.1311	26	0.0312655	0.174566	0.86	0.35	0.17	0	1	3	3	2
IMAGE277_Is159	1	375.59	0.270614	11.64	0.64	2.0513	27.6	0.0399372	0.250273	0.87	0.39	0.16	0	1	3	3	3
R01_F01_ED1	1	488.65	0.272056	11.23	0.56	4.1639	6.88	0.0204645	0.200553	0.85	0.33	0.14	0	1	0	3	1
R01_F01_Nikki01	1	478.08	0.279702	11.15	0.44	1.5959	43.7	0.0230087	0.089943	0.84	0.42	0.13	0	1	3	3	2
R01_F01_OK1	1	470.86	0.239052	7.66	0.31	1.6621	85.3	0.0127426	0.080703	0.86	0.49	0.2	0	1	4	3	3
R01_F02_OK2	1	248.41	0.314762	7.51	0.36	1.2164	83.2	0.0241536	0.378407	0.86	0.48	0.22	0	1	4	3	4
R01_F03_ED3	1	172.19	0.878797	11.05	0.22	1.9156	29.1	0.0871131	0.243917	0.92	0.32	0.14	0	1	3	3	2
R01_F03_OK3	1	485.23	0.26812	8.93	0.51	1.0882	42.8	0.0123653	0.175175	0.86	0.44	0.17	0.0020609	1	4	3	3
R01_F04_ED4	1	258.33	0.30883	11.46	0.51	4.7741	27	0.0348392	0.452909	0.87	0.34	0.2	0	1	0	4	2
R01_F04_Nikki04	1	486.49	0.257518	11.81	0.8	4.6673	28.3	0.0287776	0.100721	0.85	0.36	0.21	0	1	3	4	2
R01_F04_OK4	1	497.9	0.201245	9.62	0.43	2.5984	35.1	0.0220928	0.072304	0.83	0.44	0.14	0.0020084	1	2	3	3
R01_F04_YN04	1	273.26	0.283942	9.15	0.39	4.4722	35.3	0.0439142	0.274464	0.75	0.54	0.2	0.0036595	1	3	3	4
R01_F05_ED5	1	233.01	0.300288	12.61	0.6	3.9286	22.9	0.0557916	0.184541	0.82	0.39	0.16	0	1	2	4	3
R01_F05_OK5	1	453.58	0.245712	8.77	0.45	2.4187	55.5	0.0198421	0.249129	0.89	0.44	0.19	0	1	4	3	4
R01_F06 WR6	1	351.92	0.231075	14.31	0.7	9.5821	24.4	0.0312571	0.18186	0.81	0.44	0.16	0.0028416	1	3	3	3
R01_F06_ED6	1	269.03	0.384158	12.84	0.63	6.5693	62.9	0.0520388	0.178419	0.86	0.31	0.16	0.0037171	1	3	2	3
R01_F06_OK6	1	507.69	0.226536	10.99	0.86	3.1182	27.6	0.0216668	0.094546	0.82	0.42	0.14	0	1	3	3	3
R01_F07_OK7	1	311.91	0.448399	9.62	0.63	2.7302	25.1	0.0320605	0.208393	0.85	0.39	0.15	0	1	4	3	3
R02_F01_ED7	1	281.63	0.367717	11.72	0.41	3.7483	34.6	0.0426091	0.32667	0.83	0.38	0.12	0	1	3	3	2
R02_f01_Nikki05	1	444.88	0.308465	9.21	0.46	8.2915	0.395	0.0292214	0.168585	0.88	0.32	0.11	0	1	3	4	3
R02_F01_OK8	1	492.71	0.321954	11.43	0.67	2.0418	31.5	0.0243551	0.180634	0.83	0.4	0.11	0	1	4	3	3
R02_F02_ED8	1	355.34	0.224264	10.89	0.84	4.7193	2.01	0.0365847	0.132268	0.88	0.35	0.13	0	1	3	4	3
R02_F02_OK9	1	465.67	0.279039	9.27	0.7	3.1788	40.1	0.0214744	0.055834	0.87	0.44	0.14	0	1	4	3	5
R02_F03_Nikki07	1	323.2	0.243038	7	0.56	3.6685	78.2	0.0278465	0.086634	0.81	0.57	0.16	0.0030941	1	3	3	4
R02_F03_OK10	1	189.73	0.33184	37.37	0.26	7.538	53.3	0.0421652	0.453276	0.79	0.39	0.18	0.0052706	1	4	4	5
R02_F04_ED10	1	247.7	0.347315	13.28	0.71	1.3735	31.4	0.0444086	0.137263	0.86	0.29	0.11	0	1	3	4	3
R02_F04_OK11	1	517.71	0.21458	7.64	0.63	2.2482	37.2	0.0273843	0.0734	0.8	0.45	0.19	0	1	4	4	3
R02_F04_OK12	1	241.93	0.459224	7.81	0.67	1.8403	37.5	0.0372008	0.248006	0.8	0.44	0.08	0	1	4	3	4
R02_F05_WR12	1	273.18	0.295519	10.19	0.72	3.4299	53.9	0.0402665	0.388023	0.78	0.4	0.16	0.0036606	1	3	4	2
R02_F06_ED12	1	348.27	0.273811	13.11	0.59	4.4959	13.5	0.0401987	0.080397	0.86	0.38	0.06	0.0028713	1	2	4	2
R02_F06_ED268	1	501.46	0.292865	13.7	0.61	4.7352	63.1	0.0099709	0.051849	0.77	0.46	0.15	0	1	3	3	4
R02_F06_OK13	1	262.78	0.316919	11.37	0.34	4.9503	10.2	0.0304437	0.24355	0.73	0.53	0.13	0.0038055	1	3	3	4
R02_F07_ED13	1	174.47	0.298733	14.07	0.76	2.9244	43.8	0.0630481	0.200608	0.81	0.36	0.13	0	1	3	4	2
R02_F07_OK14	1	321.09	0.298608	9.6	0.36	3.786	55.9	0.0280295	0.189978	0.87	0.49	0.17	0	1	3	3	4
R02_F08_Nikki12	1	232.14	0.34798	9.1	0.39	5.0306	29.8	0.0516929	0.271388	0.79	0.57	0.13	0	1	0	3	3
R02_F08_OK15	1	368.53	0.276667	10.31	1.01	1.572	56.1	0.0298483	0.067837	0.83	0.44	0.16	0	1	4	3	4
R02_F09_OK16(2)	1	330.99	0.249252	10.36	0.5	1.0875	69.3	0.0241699	0.205444	0.76	0.49	0.15	0	1	3	3	4
R03_F01_OK17	1	217.28	0.355394	12.47	0.61	2.3297	37.3	0.0552283	0.041421	0.94	0.44	0.1	0	1	3	2	3
R03_F02_ED15	1	356.67	0.206157	13.7	0.72	5.2588	5.81	0.0336445	0.229904	0.86	0.35	0.13	0	1	0	4	2
R03_F02_Nikki14	1	377.67	0.321392	11.17	0.51	2.4246	31.4	0.0344216	0.063548	0.83	0.42	0.17	0	1	0	4	2
R03_F02_OK18	1	426.18	0.291192	9.71	0.75	2.0972	80.5	0.0234643	0.248721	0.71	0.58	0.15	0	1	3	2	2
R03_F03_Nikki15	1	183.47	0.352047	11.7	0.19	7.9652	1.74	0.0654058	0.294326	0.96	0.35	0.1	0	1	1	3	2
R03_F03_OK19	1	428.27	0.254863	10	0.48	5.2493	21	0.0280197	0.182128	0.87	0.45	0.16	0.00467	1	3	3	4
R03_F04_ED17	1	325.86	0.364911	12.28	0.67	4.6032	52	0.0368256	0.131959	0.82	0.35	0.16	0	1	0	3	1
R03_F04_OK20	1	446.24	0.250022	10.61	0.58	4.8062	69.5	0.0224095	0.073951	0.83	0.42	0.17	0	1	4	3	4
R03_F05_CD320	1	263.46	0.27025	14.81	0.45	2.1587	65.4	0.0341608	0.258104	0.87	0.51	0.14	0	1	4	3	2
R03_F05_ED18	1	258.99	0.330013	12.09	0.8	5.3702	23.5	0.0424727	0.096529	0.81	0.35	0.17	0	1	0	4	2
R03_F05_OK21	1	379.94	0.322998	8.41	0.49	4.084	33.6	0.021056	0.231616	0.82	0.48	0.13	0	1	4	4	4
R03_F06_ED19	1	180.41	0.455241	13.67	0.77	3.5979	25.6	0.0609722	0.482235	0.87	0.25	0.15	0	1	3	4	2
R03_F06_Nikki18	1	412.64	0.378853	11.16	0.39	5.7102	28.9	0.029081	0.101784	0.89	0.33	0.14	0	1	1	4	3
R03_F06_OK22	1	127.36	0.789651	10.94	0.43	2.2691	59.5	0.0785176	0.282663	0.84	0.42	0.15	0	1	4	4	5
R03_F07_OK23	1	273.81	0.282093	10.73	0.52	4.669	37.4	0.0328695	0.241043	0.81	0.44	0.17	0	1	3	4	4
R03_F08_Nikki20	1	276.01	0.381182	9.88	0.3	2.9383	0	0.0434767	0.199268	0.93	0.28	0.1	0	1	1	3	2
R03_F10_Nikki22	1	369.46	0.268175	11.17	0.57	3.3544	42	0.0297732	0.181346	0.86	0.56	0.147	0	1	0	4	2
R03_F11_Nikki23	1	300.78	0.28609	13.13	0.65	4.9406	66.2	0.0398963	0.123013	0.82	0.46	0.16	0	1	0	4	2
R03_F11_WR27	1	385.1	0.273721	8.52	0.41	3.2898	42.8	0.0233706	0.233706	0.75	0.46	0.17	0	1	3	4	3
R04_F02_ED23	1	257.62	0.350283	12.3	0.47	5.4232	11.1	0.0543436	0.295008	0.84	0.42	0.14	0	1	0	4	2
R04_F03_ED24	1	478.61	0.294854	13.28	0.55	3.0498	39.1	0.0250726	0.123274	0.84	0.41	0.13	0	1	2	4	3
R04_F03_Nikki26	1	389.9	0.303283	7.21	0.38	3.7964	26	0.0282124	0.112849	0.85	0.46	0.14	0	1	2	4	3
R04_F03_WR30	1	184.1	0.430255	12.51	0.59	9.2523	36.7	0.0543183	0.478001	0.76	0.46	0.27	0	1	4	4	3
R04_F05_ED26	1	245.97	0.259625	12.52	0.88	5.492	58.7	0.0487864	0.121966	0.81	0.31	0.15	0	1	1	3	2
R04_F05_Nikki28	1	331.98	0.366799	8.5	0.38	2.2669	40.7	0.0240978	0.141575	0.85	0.44	0.14	0.0030122	1	3	3	3
R04_F06_CK06	1	184.1	0.440847	9.88	0.44	4.6097	53.5	0.065182	0.315046	0.83	0.59	0.14	0	1	4	3	4
R04_F06_ED27	1	268.29	0.283611	13.69	0.72	3.2344	3.08	0.0372731	0.197547	0.81	0.39	0.19	0	1	1	3	2
R04_F06_WR33	1	349.79	0.302038	12.33	0.92	5.5756	43.1	0.0314474	0.283027	0.83	0.44	0.19	0	1	4	3	3
R04_F07_CK07	1	276.22	0.296467	10.88	0.78	8.1762	37.1	0.0470639	0.257041	0.85	0.37	0.12	0	1	2	3	2
R04_F07_Nikki30	1	396.1	0.232012	14.25	0.88	4.1774	43.3	0.0277708	0.095935	0.81	0.27	0.15	0	1	3	3	3
R04_F08_CK08	1	380.33	0.227776	10.37	0.69	4.7087	60.5	0.026293	0.22349	0.76	0.52	0.17	0	1	3	3	2
R04_F09_CK09	1	239.41	0.335658	10.33	0.7	5.2707	52.7	0.0543002	0.246439	0.83	0.41	0.19	0.0041769	1	4	3	3
R04_F09_WR36	1	388.91	0.234553	11.83	0.51	6.0936	41.6	0.0282842	0.21856	0.83	0.37	0.2	0	1	4	4	4
R04_F10_CK10	1	323.33	0.302539	12.19	0.68	1.2278	56	0.0432994	0.207219	0.86	0.49	0.1	0	1	2	2	2
R04_F10_ED31	1	323.62	0.254589	10.02	0.71	4.863	9	0.0339905	0.126692	0.78	0.34	0.16	0	1	3	3	2
R04_F10_YN36	1	378.86	0.277068	11.68	0.44	4.6997	44.5	0.026395	0.153091	0.76	0.5	0.19	0.0026395	1	3	4	4
R04_F11_CK11	1	301.45	0.351501	12.47	0.47	2.6692	91.7	0.0398076	0.218942	0.82	0.49	0.15	0	1	4	4	3
R04_F11_ED32	1	234.73	0.340561	14.08	0.74	3.2739	6.63	0.0511226	0.230052	0.8	0.39	0.14	0	1	3	3	2
R05_F02_YN41	1	358.04	0.249022	12.09	0.44	3.2031	55.1	0.0335158	0.198302	0.76	0.49	0.24	0.002793	1	4	4	4
R05_F03_ED35	1	286.33	0.297419	12.12	0.73	5.4408	43.8	0.0419097	0.192086	0.78	0.28	0.13	0	1	4	3	2
R05_F08_DM08	1	389.72	0.297085	12.36	0.47	4.0613	40.4	0.0333573	0.092374	0.8	0.53	0.1	0	1	4	3	2
R05_F08_WR47	1	324.66	0.262767	16.06	1.55	6.9032	66.2	0.0369617	0.080084	0.81	0.42	0.19	0	1	4	3	2
R05_F09_WR48	1	207.46	0.332305	8.78	0.52	5.4321	51.3	0.0433819	0.144606	0.84	0.43	0.19	0.0048202	1	4	3	4
R05_F10_YN49	1	192.04	0.548427	7.57	0.61	3.2129	25.6	0.0520725	0.317642	0.85	0.57	0.17	0	1	4	3	4
R05_F11_YN50	1	202.99	0.280654	8	0.33	5.701	30.7	0.0591162	0.241391	0.88	0.52	0.13	0	1	1	2	2
R05_F12_WR51	1	314.39	0.164764	11.36	0.72	2.5172	39.6	0.0286269	0.178123	0.8	0.35	0.22	0	1	4	4	3
R06_F03_YN54	1	238.1	0.394246	11.01	0.71	4.0537	10.4	0.050399	0.251995	0.84	0.43	0.19	0.0041999	1	3	3	4
R06_F05_DM20	1	253.49	0.400608	10.33	0.41	4.259	68.8	0.0473391	0.173577	0.8	0.57	0.13	0.0039449	1	4	3	3
R06_F07_DM22	1	311.5	0.239358	7.59	0.74	3.3615	40.4	0.0321027	0.189406	0.82	0.51	0.15	0	1	4	3	3
R06_F07_WR58	1	202.45	0.335737	11.03	0.75	2.9009	28.3	0.0592739	0.409978	0.83	0.39	0.19	0	1	4	3	3
R06_F08_CK39	1	301.85	0.20434	10.78	0.57	3.241	72.9	0.0496936	0.129203	0.87	0.44	0.13	0	1	2	3	2
R06_F08_WR59	1	388.97	0.18693	8.59	0.57	6.3519	18.3	0.023138	0.151683	0.81	0.39	0.25	0.0051418	1	2	4	3
R06_F09_DM24	1	234.29	0.344829	14.38	0.46	2.9646	30.3	0.0512186	0.371335	0.83	0.55	0.15	0	1	4	2	3
R06_F09_ED227	1	292.37	0.227452	10.72	0.83	2.2574	29	0.0478845	0.324931	0.85	0.36	0.16	0.0034203	1	4	3	3
R06_F10_ED228	1	395.9	0.232887	10.89	0.81	7.1291	26.1	0.0328366	0.169235	0.88	0.28	0.12	0	1	0	3	2
R06_F10_WR61	1	438.54	0.25122	9.21	0.89	6.1667	28.5	0.0273635	0.116295	0.73	0.37	0.18	0.0022803	1	4	4	3
R06_F11_ED229	1	367.88	0.200881	10.39	0.62	3.3268	76.3	0.0299011	0.076112	0.86	0.38	0.17	0	1	3	4	3
R06_F11_WR62	1	225.77	0.286619	11.53	0.31	3.0181	92.4	0.0442929	0.194889	0.83	0.45	0.17	0.0044293	1	4	4	3
R06_F12_DM27	1	199.52	0.307488	10.93	0.56	4.1362	30.5	0.0551323	0.275662	0.85	0.47	0.13	0	1	3	2	4
R06_F12_ED230	1	257.53	0.350949	9.61	0.8	3.206	37	0.0427135	0.163088	0.8	0.36	0.19	0.003883	1	4	3	3
R06_F13_YN64	1	317.39	0.309178	9.95	0.47	4.1233	56.9	0.031507	0.160686	0.84	0.48	0.24	0.0031507	1	4	4	4
R06_F14_YN65	1	300.66	0.317635	11.55	0.54	5.6337	72	0.0365862	0.179605	0.79	0.45	0.17	0	1	4	3	4
R06_F15_YN66	1	285.8	0.281596	10.92	0.57	3.3034	33.9	0.0384885	0.19944	0.76	0.46	0.19	0.003499	1	4	4	4
R06_F16_DM31	1	251.88	0.343894	8.17	0.54	5.6027	49.2	0.0476417	0.28585	0.79	0.46	0.15	0	1	2	3	2
R07_F01_ED231	1	308.44	0.280606	10.96	0.98	4.0069	29	0.0421476	0.314486	0.84	0.36	0.15	0	1	4	3	3
R07_F01_WR64	1	365.89	0.275629	12.75	0.64	4.4862	40	0.0409959	0.215912	0.83	0.32	0.16	0	1	3	4	2
R07_F02_ED232	1	465.14	0.248463	8.22	0.46	3.6342	127	0.0300985	0.098895	0.86	0.34	0.11	0.0042998	1	3	3	2
R07_F02_WR65	1	375.94	0.124036	8.2	0.68	4.69	29.6	0.0266	0.266	0.79	0.45	0.19	0	1	4	4	3
R07_F03_ED233	1	284.95	0.315038	9.16	0.76	7.341	47.4	0.0491314	0.178979	0.86	0.43	0.18	0	1	1	3	2
R07_F04_ED234	1	374.78	0.298548	8.5	0.51	6.2309	46.9	0.0293506	0.12007	0.8	0.39	0.16	0	1	4	3	3
R07_F05_ED235	1	297.56	0.278935	9.35	0.57	3.4494	54.6	0.0336067	0.198279	0.76	0.41	0.18	0.0134427	1	4	3	3
R07_F05_WR68	1	304.22	0.281342	9.2	0.48	4.371	14	0.0328709	0.12491	0.78	0.46	0.19	0.0098613	1	4	4	3
R07_F06_DM38	1	288.03	0.293476	9.31	0.37	2.744	64.5	0.0347186	0.312467	0.79	0.53	0.15	0	1	2	2	2
R07_F06_ED236	1	256.25	0.3232	10.51	0.58	4.7799	26.7	0.0429268	0.355122	0.82	0.34	0.14	0	1	3	3	3
R07_F07_ED237	1	411.77	0.353183	9.94	0.85	6.2762	32.7	0.0291425	0.109284	0.79	0.35	0.2	0.0048571	1	3	4	3
R07_F08_ED238	1	411.28	0.228287	12.49	0.4	3.7214	61.9	0.0243143	0.111846	0.75	0.36	0.19	0.0024314	1	4	3	3
R07_F09_CK57	1	303.95	0.279421	11.09	0.66	4.6928	72.7	0.0361902	0.506662	0.81	0.57	0.16	0.00329	1	4	3	3
R07_F09_ED239	1	214.21	0.356286	9.89	0.46	6.184	90	0.0746931	0.270762	0.87	0.34	0.12	0	1	4	3	3
R07_F10_ED240	1	506.75	0.187114	11.93	0.56	6.1395	68.6	0.0236803	0.167736	0.73	0.45	0.2	0	1	4	3	3
R07_F11_CK59	1	317.28	0.302666	10.6	0.6	3.9133	11.8	0.0409733	0.261599	0.811	0.51	0.37	0	1	4	3	3
R07_F11_ED241	1	408.7	0.308662	12.25	0.61	2.6487	77.5	0.0367017	0.132126	0.79	0.42	0.15	0.0024468	1	4	3	2
R07_F17_CK65	1	370.07	0.170373	15.22	0.78	6.1903	19.7	0.0297241	0.183749	0.77	0.35	0.11	0	1	4	3	3
R08_F01_ED242	1	317.31	0.239766	15.31	0.68	9.5675	12.5	0.0378179	0.242665	0.86	0.38	0.16	0.012606	1	4	3	3
R08_F02_ED243	1	391.3	0.26688	9.38	0.42	4.4127	61.3	0.030667	0.107335	0.86	0.34	0.14	0.0025556	1	3	3	2
R08_F03_DM50	1	408.62	0.250012	10.72	0.6	10.2566	76.3	0.0244726	0.327933	0.82	0.47	0.16	0	1	4	3	3
R08_F03_ED167	1	262.26	0.326165	11.97	1.14	4.4868	21.5	0.0533821	0.533821	0.85	0.32	0.16	0	1	2	3	2
R08_F03_ED244	1	509.41	0.235586	11.85	0.9	7.8976	58.9	0.0274828	0.170786	0.86	0.31	0.17	0	1	2	4	2
R08_F04_ED168	1	521.8	0.195324	13.46	0.93	2.5566	18	0.0249138	0.180146	0.87	0.33	0.14	0	1	4	3	2
R08_F04_ED245	1	387.93	0.207228	12.45	1.18	4.2119	81	0.0309334	0.193334	0.84	0.34	0.17	0	1	4	3	3
R08_F05_ED246	1	392.59	0.2672	11.47	0.79	3.5855	45.4	0.0331134	0.18085	0.84	0.44	0.17	0	1	4	4	2
R08_F06_ED247	1	159.53	0.709584	10.65	0.62	5.57	6.85	0.075221	0.307152	0.83	0.4	0.12	0	1	4	3	3
R08_F06_ED248	1	344.45	0.351575	11.69	0.5	3.0282	38.2	0.0348381	0.197416	0.84	0.48	0.13	0	1	4	3	3
R08_F07_CK77	1	280.29	0.354597	9.76	0.45	3.4927	26.1	0.0428128	0.174819	0.83	0.46	0.12	0.0035677	1	3	3	3
R08_F10_DM57	1	322.73	0.28826	11.49	0.49	2.6032	53.8	0.0371828	0.210702	0.79	0.5	0.14	0	1	4	3	3
R08_F10_ED174	1	290.22	0.289677	11.69	0.81	4.9909	45.2	0.0379023	0.192957	0.77	0.28	0.15	0	1	4	4	3
R08_F11_CK78	1	372.01	0.27381	9.06	0.43	2.1866	59	0.0322572	0.16935	0.83	0.5	0.11	0	1	2	2	3
R08_F11_DM58	1	322.43	0.208386	10.43	0.66	2.2951	36.5	0.0403188	0.130261	0.81	0.58	0.14	0.0031014	1	4	3	4
R08_F12_CK79	1	247.82	0.319345	9.99	0.31	5.2412	58.2	0.0403519	0.133161	0.81	0.5	0.08	0	1	3	2	2
R08_F14_DM61	1	246.31	0.310219	9.99	0.39	2.9339	67.9	0.0405992	0.227356	0.78	0.6	0.17	0	1	4	3	4
R08_F15_DM62	1	235.05	0.30887	13.12	0.36	6.2031	86.4	0.051053	0.263774	0.83	0.44	0.13	0	1	3	3	1
R08_F16_DM63	1	307.72	0.27447	10.39	0.62	2.5147	46.3	0.0389965	0.146237	0.83	0.46	0.15	0	1	4	2	3
R08_F17_DM64	1	279.8	0.308435	9.96	0.5	5.1481	59	0.0393138	0.239457	0.77	0.49	0.14	0.003574	1	3	2	2
R08_F18_CK85	1	290.34	0.291968	9.63	0.56	2.9002	66.7	0.0413309	0.244541	0.81	0.41	0.15	0	1	2	3	2
R08_F19_CK86	1	352.63	0.237813	13.04	0.83	4.682	51.3	0.03403	0.218359	0.87	0.36	0.15	0.0056717	1	4	3	2
R09_F02_CK88	1	351.75	0.27838	16	0.73	2.5783	54.8	0.0341151	0.216063	0.83	0.4	0.13	0	1	1	2	1
R09_F03_CK89	1	324.11	0.329086	12.27	0.55	4.3271	59.9	0.0401098	0.151183	0.83	0.37	0.19	0	1	3	3	3
R09_F03_DM67	1	346.34	0.264191	10.43	0.64	5.1433	55.2	0.0317607	0.158803	0.79	0.51	0.14	0	1	4	3	2
R09_F04_CK90(2)	1	264.16	0.326696	11.81	0.68	4.5676	44.2	0.0416414	0.29149	0.83	0.42	0.16	0	1	4	3	3
R09_F04_ED181	1	300.52	0.245774	15.1	0.56	4.2335	26.9	0.0399308	0.236257	0.82	0.33	0.15	0	1	4	4	3
R09_F05_CK91	1	433.95	0.315267	13.02	0.78	5.5804	51.5	0.027653	0.202788	0.82	0.39	0.11	0	1	3	3	2
R09_F05_ED182	1	392.07	0.248144	13.32	0.86	1.6838	49.8	0.0306068	0.170888	0.84	0.35	0.14	0	1	3	3	3
R09_F06_CK92	1	380.18	0.274712	10.46	0.61	3.9616	46.4	0.031564	0.181493	0.82	0.39	0.15	0	1	2	3	2
R09_F07_CK93	1	341.67	0.264378	12.02	1.28	4.1933	42.8	0.0351216	0.175608	0.85	0.48	0.17	0	1	4	4	3
R09_F07_DM71	1	345.46	0.261072	12.24	0.39	7.4715	43.6	0.0318416	0.159208	0.79	0.55	0.13	0	1	4	2	4
R09_F08_CK94	1	306.12	0.257775	12.34	0.68	3.277	63.7	0.0359336	0.241735	0.82	0.44	0.2	0	1	4	4	3
R09_F08_DM72	1	356.29	0.265598	10.42	0.48	2.7741	45	0.0336804	0.26383	0.81	0.42	0.14	0	1	3	2	2
R09_F10_ED187	1	279.59	0.234915	9.87	0.49	5.0447	42.9	0.0464967	0.293287	0.9	0.37	0.14	0	1	2	4	3
R09_F11_ED188	1	439.8	0.24045	11.51	1.61	5.6163	35.3	0.0272851	0.234197	0.91	0.34	0.22	0	1	4	3	2
R10_F02_ED190	1	487.3	0.257603	8.13	0.38	5.2348	55.7	0.0266776	0.20316	0.81	0.37	0.17	0	1	3	4	2
R10_F03_ED191	1	462.86	0.244696	16.67	0.59	3.9074	45.5	0.0259258	0.056172	0.86	0.35	0.13	0	1	1	3	1
R10_F06_DM89	1	477.89	0.279186	6.53	0.27	4.5413	134	0.0188328	0.221808	0.83	0.39	0.13	0	1	3	2	1
R10_F06_ED194	1	178.54	0.228352	10.96	0.74	7.7048	46.2	0.0784138	0.442478	0.84	0.35	0.16	0.005601	1	5	3	2
R10_F07_ED195	1	510	0.261882	12.74	0.8	6.9037	97.1	0.0235294	0.158824	0.79	0.32	0.2	0	1	4	3	2
R10_F11_ED199	1	424.07	0.249558	11.6	1.03	5.6497	37.5	0.0282972	0.134412	0.74	0.32	0.16	0	1	4	4	2
R11_F02_ED201	1	372.35	0.243266	11.99	1	3.847	25.9	0.0295421	0.145025	0.81	0.33	0.14	0	1	4	3	2
R11_F03_DM104	1	315.44	0.266992	12.02	0.65	5.8635	75.4	0.0380421	0.278975	0.81	0.49	0.15	0	1	4	3	2
R11_F03_ED202	1	306.77	0.273332	13.44	0.76	4.2048	38.2	0.042377	0.179287	0.8	0.3	0.16	0	1	3	4	2
R11_F04_DM105	1	462.39	0.221826	8.98	0.43	9.2188	50.6	0.0259521	0.12111	0.81	0.52	0.18	0	1	4	3	3
R11_F08_ED207	1	264.94	0.303427	13.98	0.53	6.5011	57	0.0415188	0.354797	0.83	0.41	0.19	0	1	3	3	3
R11_F09_ED208	1	311.39	0.376826	11.08	0.45	3.5641	56.2	0.0385369	0.282604	0.86	0.35	0.15	0	1	0	4	2
R11_F10_ED209	1	480.27	0.286589	11.6	0.45	8.0354	2.18	0.0249859	0.081204	0.85	3.14	0.16	0	1	3	4	3
R11_F11_ED210	1	434.25	0.36053	11	0.4	3.17	65.2	0.0207254	0.246402	0.72	0.47	0.16	0.0023028	1	4	3	3
R12_F01_ED211	1	244.55	0.381435	11.62	0.77	3.6249	34.4	0.0654263	0.33531	0.91	0.35	0.16	0	1	3	4	2
R12_F02_ED212	1	453.61	0.191839	13.31	0.45	5.2255	20.3	0.028659	0.127863	0.84	0.39	0.11	0	1	3	4	2
R12_F03_ED213	1	415.14	0.295732	15.36	0.92	7.2751	80.7	0.0240883	0.180662	0.74	0.37	0.17	0.0024088	1	2	3	3
R12_F04_ED214	1	263.24	0.405372	13.4	0.6	5.3437	57.9	0.041787	0.151953	0.84	0.36	0.17	0	1	0	4	2
R12_F05_ED215	1	333.01	0.321462	11.49	0.64	4.2432	12.8	0.033032	0.126122	0.81	0.39	0.16	0	1	3	3	3
R12_F07_DM123	1	338.16	0.283741	7.24	0.41	2.6029	57.5	0.032529	0.165602	0.82	0.61	0.16	0.0029572	1	4	2	2
R12_F12_DM128	1	219.51	0.26591	10.82	0.48	3.9702	56	0.0546672	0.123001	0.8	0.51	0.2	0	1	4	3	3
R12_F13_DM129	1	282.61	0.285482	10.05	0.42	1.7677	64.6	0.031846	0.127384	0.8	0.56	0.15	0.0035384	1	4	3	2
R12_F14_DM130	1	206.36	0.339649	10.5	0.54	2.6721	81	0.048459	0.155069	0.79	0.49	0.17	0.0048459	1	4	2	3
R13_F03_DM137	1	185.56	0.367752	13.51	0.32	2.4424	77.5	0.0538909	0	0.78	0.61	0.12	0.0053891	1	4	2	1
Image089_Lk29	1	406.962	0.249009	11.6137	0.51627	0.5964	9.92	0.0294868	0.181835	0.817	0.38267	0.159565	0.0024572	1	3	3	2
Image092_lk32	1	406.989	0.239427	11.837	0.72456	0.8875	64.3	0.0294848	0.164624	0.831	0.3859	0.126859	0.0024571	1	3	4	2
Image094_lk34	1	234.286	0.257344	9.117	0.60963	1.6869	67.4	0.0469512	0.170731	0.751	0.50572	0.159445	0.0042683	1	4	4	2
Image095_lk35	1	218.038	0.307235	9.129	0.70523	1.2142	15.7	0.0412772	0.155936	0.831	0.49706	0.198099	0	1	3	3	2
Image097_lk37	1	318.487	0.261747	7.8577	0.79927	0.8527	47.1	0.0376781	0.175831	0.835	0.42835	0.667259	0	1	2	3	1
Image098_lk38	1	312.602	0.339604	9.544	1.33495	0.5293	52.4	0.0383875	0.204733	0.82	0.44935	0.649954	0	1	2	3	2
Image100_lk40	1	387.565	0.211291	12.894	0.62053	0.6713	68.9	0.0309625	0.188356	0.839	0.4244	0.493545	0.0025802	1	2	3	2
Image101_lk41	1	251.111	0.298585	9.5457	0.56731	1.671	37.6	0.039823	0.187168	0.85	0.43038	0.211748	0	1	3	2	3
Image103_lk43	1	416.477	0.246131	10.3677	0.9374	0.2535	71.4	0.0312142	0.170478	0.812	0.41475	0.424334	0.0024011	1	4	3	2
Image104_lk44	1	353.774	0.250869	12.6553	0.78994	1.34	42.4	0.03392	0.192213	0.836	0.39187	0.177794	0	1	3	2	2
Image105_lk45	1	339.252	0.295403	11.7633	1.20573	1.1818	0	0.0353719	0.221075	0.841	0.41822	0.616882	0	1	3	3	2
Image106_lk46	1	288.285	0.264027	11.92	0.63476	0.5921	62	0.0416255	0.239346	0.774	0.52325	0.563958	0	1	2	3	2
Image108_lk48	1	259.608	0.29783	9.4313	0.63702	1.2439	1.47	0.0423716	0.231118	0.822	0.42164	0.198991	0.003852	1	4	4	2
IMAGE040_Sv665	4	284.722	0.438853	19.7393	0.2868	2.611	48.9	0.035122	0.094829	0.764	0.514	0.061033	0.0035122	3	4	2	4
IMAGE055_Is259	4	349.754	0.370672	34.953	0.2053	2.1766	49.8	0.0285915	0.074338	0.794	0.404	0.043822	0.0028592	3	3	3	2
IMAGE059_SH32	4	172.266	0.532908	14.745	0.40865	0.5676	33.8	0.0464398	0.06966	0.749	0.442	0.086637	0	3	4	4	4
IMAGE061_Is265	4	315.441	0.420522	17.71	0.25462	0.6586	39	0.0253613	0.047552	0.826	0.423	0.052186	0.0031702	3	2	3	2
IMAGE061_SH34	4	227.222	0.421108	10.875	0.43182	0.5802	48.7	0.0352079	0.070416	0.802	0.339	0.065336	0	3	2	4	3
IMAGE062_Is267	4	262.963	0.40017	16.097	0.27388	2.6369	50	0.0304225	0.030423	0.896	0.3	0.052439	0.0038028	2	2	3	2
IMAGE064_SH37	4	321.094	0.262403	4.5385	0.54468	0.6473	34.4	0.0311435	0.090316	0.838	0.474	0.054894	0	2	2	4	2
IMAGE066_Is271	4	268.571	0.376023	14.974	0.44699	2.3401	55	0.0335107	0.044681	0.852	0.534	0.072422	0	2	2	3	2
IMAGE67_Sv689	4	236.702	0.468471	6.597	0.3124	0.8901	38	0.0295731	0.042247	0.799	0.362	0.063567	0.0042247	3	2	4	3
IMAGE078_SH40	4	163.588	0.601658	13.5655	0.41241	0.4561	36.5	0.0489033	0.134484	0.752	0.506	0.079075	0	3	2	4	2
IMAGE115_Sk232	4	346.774	0.336585	17.0105	0.25509	2.118	36.3	0.0259535	0.063442	0.896	0.537	0.024001	0	3	3	2	1
IMAGE117_SK234	4	240.244	0.489927	10.6202	0.35402	0.9914	38.4	0.0332995	0.087411	0.81	0.555	0.036145	0.0041624	3	3	2	2
IMAGE118_SK235	4	208.252	0.426608	12.189	0.34382	0.972	34	0.038415	0.057622	0.779	0.376	0.057588	0	3	4	3	3
IMAGE120_SK236	4	264.052	0.393267	17.63	0.58995	0.7921	15.3	0.0302971	0.05302	0.883	0.587	0.060996	0.0037871	3	4	2	2
IMAGE122_SK237	4	375.893	0.240707	16.6368	0.27595	1.0659	20.5	0.0292636	0.07981	0.872	0.561	0.034891	0	3	4	2	2
IMAGE123_Sk238	4	309.091	0.347707	16.667	0.43265	2.1225	29.7	0.0291176	0.064706	0.893	0.472	0.066956	0	3	3	2	2
IMAGE124_Sk239	4	203.571	0.390969	6.934	0.24138	1.2109	90	0.0392983	0.039298	0.867	0.169	0.028568	0.0049123	3	2	2	2
IMAGE166_NU288	4	194.545	0.488699	13.48	0.20331	0.658	86.7	0.0359814	0.056542	0.857	0.463	0.054865	0	3	3	4	4
IMAGE184_SK296	4	231.915	0.48654	13.083	0.08153	1.9973	90.3	0.0301835	0.056055	0.869	0.608	0.072402	0	3	4	3	4
IMAGE195_NU317	4	173.423	0.500332	13.917	0.15591	0.6419	21.9	0.04613	0.109559	0.695	0.518	0.093136	0.0057662	3	1	4	2
IMAGE240_NU344	4	283.217	0.437149	14.4988	0.31438	2.3169	52.9	0.0282469	0.098864	0.836	0.537	0.382805	0	3	2	4	4
IMAGE253_NU152	4	226.486	0.506941	8.9358	0.39428	1.1664	45.3	0.0397376	0.110382	0.738	0.511	0.133076	0	2	4	4	3
IMAGE253_NU353	4	195.98	0.487259	9.719	0.27264	0.166	98	0.0408205	0.112256	0.73	0.578	0.121551	0	3	2	4	4
IMAGE280_NU363	4	304	0.475326	14.3242	0.30779	0.218	43.9	0.0296053	0.144737	0.805	0.463	0.05502	0	3	2	4	2
IMAGE333_NU178	4	277.143	0.476909	13.4703	0.34112	0.4233	80.2	0.028866	0.075773	0.791	0.551	0.087381	0	3	2	4	2
R01_F01_BA67	4	409.046	0.208766	14.039	0.3451	0.5253	66.3	0.0317813	0.066007	0.876	0.485	0.142126	0	2	1	5	5
R01_F02_BA2	4	334.615	0.452565	13.4123	0.34398	0.2076	58	0.0268966	0.08069	0.845	0.642	0.160627	0.0029885	2	2	4	5
R01_F02_BA68	4	374.269	0.340683	19.9938	0.51678	0.1844	40.3	0.0320625	0.122906	0.854	0.604	0.109598	0	2	1	3	5
R01_F04_BA4	4	277.027	0.381526	20.157	0.24554	0.2822	36.8	0.0324878	0.083024	0.813	0.591	0.109707	0	3	2	3	4
R01_F04_BA70	4	261.552	0.408252	11.128	0.34134	0.2258	46	0.03441	0.087937	0.793	0.557	0.088036	0.01147	3	2	5	4
R02_F01_BA73	4	300	0.39752	15.672	0.18929	0.24	65.5	0.03	0.043333	0.806	0.55	0.109736	0	2	3	5	4
R02_F02_BA7	4	201.143	0.482388	13.1428	0.48517	1.0745	65.4	0.0447443	0.134233	0.824	0.586	0.128223	0	2	2	5	4
R02_F05_BA10	4	134.553	0.551292	0	0	0.2753	60.1	0.0520241	0.03716	0.762	0.351	0.088135	0	2	4	5	4
R10_F02_BA65	4	218.75	0.329614	13.009	0.61221	0.2356	71.7	0.0411429	0.073143	0.828	0.56	0.08517	0.0045714	3	4	3	4
R10_F03_BA66	4	192.556	0.382252	15.927	1.13615	0.2992	3.84	0.0415464	0.04674	0.762	0.539	0.145542	0.0051933	2	4	3	4
IMAGE124_BS16	5	270.896	0.539266	0	0	1.0398	79.1	0.0332231	0	0.842	0	0	0	2	4	5	4
IMAGE174_CD116	5	179.082	0.609436	0	0	0.2699	56.2	0.0446723	0	0.809	0	0	0.005584	2	3	5	5
IMAGE183_CD123	5	207.865	0.527573	0	0	0.4204	68.9	0.0384865	0	0.846	0	0	0.0048108	2	4	5	5
IMAGE184_CD124	5	302.614	0.543098	0	0	0.2806	73.9	0.0297409	0	0.78	0	0	0	2	4	3	4
IMAGE192_CD132	5	171.496	0.494431	0	0	0.2986	87.6	0.0408173	0	0.779	0	0	0	2	4	5	5
IMAGE197_CD137	5	196.094	0.569319	0	0	0.3051	53.1	0.0356972	0	0.791	0	0	0.0050996	2	3	5	5
IMAGE238_BS22	5	394.175	0.387143	0	0.3	0.3658	69.4	0.0253694	0.048202	0.827	0.505	0.001764	0	2	3	3	3
R01_F01_DM343	5	289.032	0.472934	7.6905	0.21953	0.6499	82.1	0.0311384	0.00346	0.734	0.602	0.003782	0	2	2	5	4
R01_F02_YN02	5	229.825	0.533867	0	0	0.3639	35.6	0.030458	0	0.767	0	0	0.0043511	2	3	5	5
R01_F03_DM345	5	296.85	0.489971	0	0	0.6203	93	0.0235809	0.003369	0.841	0.414	0.00237	0	2	4	5	4
R02_F03_DM350	5	292.053	0.424957	9.991	0.38806	0.4332	66.4	0.0273923	0.023968	0.85	0.691	0.00354	0	2	3	5	5
R03_F11_YN26	5	232.335	0.526709	10.778	0.30678	0.2293	80.8	0.034433	0.008608	0.847	0.853	0.007776	0.0043041	2	3	5	5
R04_F02_YN28	5	259.444	0.505546	9.147	0.23271	0.2279	65.3	0.0308352	0	0.801	0	0	0	2	3	5	4
R05_F01_YN40	5	329.665	0.438542	16.96	1.04488	0.5837	1.64	0.0242671	0.012134	0.784	0.435	0.003917	0.0151669	2	4	5	5
R05_F03_YN42	5	191.747	0.520446	0	0	0.1978	79	0.0417216	0	0.857	0	0	0	2	4	5	5
R05_F04_YN43	5	179.197	0.51925	0	0	0.3521	99.3	0.0446436	0	0.798	0	0	0.0055805	2	4	5	5
R05_F05_YN44	5	188.235	0.502563	0	0	0.6709	8.55	0.0425001	0	0.862	0	0	0	2	4	5	5
R05_F06_YN45	5	192.718	0.605003	0	0	0.2136	3.77	0.0415114	0	0.77	0	0	0.0051889	2	2	5	5
R05_F08_YN47	5	194.118	0.497409	0	0	0.2297	78.4	0.0360605	0	0.797	0	0	0.0051515	2	4	5	5
R05_F09_YN48	5	167.764	0.482076	0	0	0.3856	8.69	0.0417253	0	0.727	0	0	0	2	2	5	5
R05_F12_YN51	5	397.087	0.355365	14.5195	0.33205	0.4936	49.1	0.0251834	0.010073	0.823	0.563	0.003606	0	2	2	5	5
R06_F01_YN52	5	263.358	0.454025	0	0	0.2718	88.9	0.034174	0	0.802	0	0	0	2	3	4	4
R06_F02_YN53	5	219.726	0.482319	0	0	0.3642	30.3	0.036409	0	0.72	0	0	0.0045511	2	3	5	4
R06_F05_YN56	5	141.6	0.53779	0	0	0.2628	21.2	0.0564972	0	0.849	0	0	0	2	4	5	5
R06_F08_YN59	5	131.105	0.456489	0	0	6.6265	72.7	0.0533923	0	0.769	0	0	0	2	2	5	5
R06_F10_YN61	5	244.589	0.452944	0	0	4.3331	29.5	0.0367964	0	0.81	0	0	0.0040885	2	4	5	5
R06_F12_YN63	5	368.376	0.374587	0	0	2.8373	57.2	0.0271462	0	0.875	0	0	0	2	4	5	5
R06_F13_DM28	5	260.544	0.535272	0	0	3.8389	72.2	0.0345431	0	0.869	0	0	0.0230287	2	4	5	5
R06_F01_DM164	5	200.592	0.617427	12.722	0.62272	2.2969	83.9	0.0398819	0.004985	0.841	0	0	0.0049852	2	4	5	5
R06_F09_DM172	5	289.286	0.454004	20.454	0.67646	0.938	72.9	0.0311111	0.01037	0.862	0.472	0.010255	0.0172839	2	2	5	5
R07_F01_YN67	5	212.088	0.565624	11.473	0.51936	5.3173	74.3	0.0330052	0	0.829	0	0	0	2	4	5	5
R07_F02_YN68	5	250.898	0.443072	0	0	3.1548	40.8	0.0358712	0.003986	0.873	0.405	0.00405	0.0079714	2	4	5	5
R09_F01_YN93	5	217.197	0.589539	0	0	5.5977	35.6	0.041437	0.023021	0.811	0.727	0.00283	0.0046041	2	2	5	4
R10_F09_DM92	5	245.856	0.477743	0	0	6.044	42	0.0366068	0.012202	0.863	0.714	0.005435	0	2	4	5	5
R12_F01_DM140	5	236.364	0.528435	0	0	7.3845	46.5	0.0423076	0.025385	0.836	0.53	0.004239	0.0042308	2	4	5	5
R12_F11_DM127	5	268.817	0.410681	0	0	4.5807	53.5	0.02976	0.00372	0.787	0.499	0.008616	0.01116	2	4	5	4
R13_F01_DM135	5	317.944	0.485133	0	0	3.0089	48.5	0.0251617	0.066049	0.892	0.643	0.003575	0.0062904	2	4	5	5
slide1_001	6	159.936	0.57705	10.4656	0.59696	6.568	60.8	0.02503	0.193948	0.78	0.474	0.42	0	1	2	4	2
slide1_002	6	260.825	0.512512	9.0093	0.73511	4.9109	52	0.0345059	0.199367	0.87	0.524	0.15	0	1	4	3	3
slide1_003	6	215.978	0.607386	13.4723	0.66608	3.8929	15.9	0.0277806	0.125013	0.82	0.46	0.15	0	1	0	3	4
slide1_004	6	294.845	0.469494	12.383	0.58383	4.3012	92.1	0.0339161	0.193322	0.86	0.453	0.14	0	1	1	4	2
slide01_005	6	221.526	0.693472	14.5995	0.73532	3.5815	26.5	0.0361131	0.230221	0.86	0.436	0.15	0	1	1	2	2
slide1_006	6	350.788	0.489156	11.2998	0.34576	4.5177	42.9	0.0228058	0.102626	0.878	0.526	0.08	0	1	1	3	2
slide1_007	6	295.439	0.468533	14.8333	0.61453	5.7588	74.7	0.0304631	0.16924	0.82	0.459	0.16	0	1	2	2	2
slide01_008	6	363.887	0.428342	10.413	0.9635	8.5005	21.4	0.024733	0.20336	0.83	0.47	0.21	0	1	3	2	4
slide01_009	6	351.878	0.478063	12.1407	0.52519	5.7005	42.7	0.0284189	0.213142	0.81	0.412	0.15	0	1	3	3	2
slide1_010	6	323.881	0.474452	12.1465	1.01988	3.7789	66.5	0.027788	0.169815	0.81	0.367	0.15	0	1	2	4	2
slide1_011	6	334.074	0.505086	12.9445	0.86508	1.6223	20.5	0.0299335	0.185588	0.86	0.381	0.08	0	1	2	3	2
slide1_012	6	461.538	0.410569	47.5507	0.69555	7.7865	25.9	0.0281667	0.290334	0.84	0.37	0.37	0	1	2	3	2
slide1_013	6	307.067	0.465016	9.6873	0.5363	5.1587	10.3	0.0325662	0.20191	0.86	0.459	0.2	0	1	2	4	2
slide1_14	6	299.544	0.482527	12.4714	0.53902	5.5754	54.7	0.0367225	0.21032	0.82	0.424	0.13	0	1	1	2	2
slide1_015	6	269.075	0.514897	11.3658	0.49975	3.9492	41.1	0.0334479	0.189538	0.82	0.445	0.12	0	1	1	3	2
slide1_016	6	350.695	0.396553	9.7542	0.42019	2.9733	42.9	0.0285148	0.216713	0.8	0.497	0.17	0	1	3	4	5
slide1_017	6	336.809	0.456659	10.3448	0.44167	4.8312	56.4	0.0326595	0.192988	0.85	0.482	0.25	0	1	1	3	3
slide1_018	6	294.36	0.487556	11.229	0.58098	2.4841	35.1	0.0305748	0.16986	0.89	0.484	0.06	0	1	3	3	3
slide1_019	6	421.385	0.480152	11.306	0.52058	5.1951	35.3	0.0237313	0.19697	0.83	0.443	0.16	0	1	1	3	2
slide1_020	6	419.008	0.492041	9.8238	0.66828	2.2373	12.9	0.0262525	0.21718	0.82	0.448	0.24	0	1	2	4	2
slide1_021	6	339.398	0.482493	11.194	0.65111	4.968	8.39	0.0294639	0.203301	0.748	0.469	0.16	0	1	2	4	4
slide1_023	6	280.217	0.477605	13.8437	0.48246	2.9999	56.3	0.0285493	0.146315	0.79	0.494	0.15	0	1	2	3	3
slide1_026	6	317.568	0.440192	12.0923	0.52069	3.4589	40	0.0314893	0.192085	0.8	0.52	0.14	0	1	2	3	3
slide1_027	6	283.784	0.477437	10.144	0.34441	5.5828	39.9	0.0352381	0.179714	0.81	0.518	0.1	0	1	1	5	2
slide1_028	6	363.426	0.461103	13.5616	0.64723	3.9146	16.6	0.0302675	0.176102	0.8	0.404	0.16	0	1	2	3	2
slide2_01	7	391.951	0.26362	12.5923	0.65857	6.5241	66.1	0.0255134	0.19135	0.86	0.424	0.16	0	1	1	2	2
slide2_02	7	374.086	0.425819	11.729	0.9794	6.6813	51.4	0.0267318	0.165737	0.84	0.507	0.14	0	1	2	3	2
slide2_03	7	334.104	0.425149	11.2523	0.49236	4.2074	21.2	0.0299308	0.179585	0.8	0.557	0.13	0	1	1	3	2
slide2_04	7	384.18	0.417172	11.7482	0.49004	2.4778	13.3	0.0260295	0.171794	0.84	0.457	0.12	0	1	2	3	2
slide2_05	7	299.726	0.417028	10.059	0.34266	6.8683	54.7	0.0333638	0.206856	0.81	0.619	0.16	0	1	1	3	2
slide2_06	7	434.234	0.423907	14.9097	0.53044	5.0288	73.3	0.0230291	0.161203	0.79	0.416	0.09	0	1	1	4	2
slide2_07	7	445.135	0.319189	18.1765	0.581	8.235	37.9	0.0224651	0.197693	0.8622	0.405	0.178645	0	1	1	2	2
slide2_08	7	434.649	0.344784	11.2723	0.45374	5.1701	61.2	0.0276085	0.190959	0.83	0.494	0.11	0	1	1	3	2
slide2_09	7	415.788	0.434705	12.424	0.54759	4.7529	35.6	0.0216456	0.190001	0.86	0.419	0.13	0	1	2	3	3
slide2_11	7	401.676	0.40562	12.6044	0.55553	3.6949	88.8	0.0248957	0.189207	0.87	0.415	0.1	0	1	1	3	1
1	8	368.276	0.40953	15.4938	0.46236	4.0116	38.4	0.0244382	0.130337	0.787	0.45	0.172775	0	1	2	4	2
3	8	435.287	0.439501	14.165	0.63954	4.3998	46.2	0.020676	0.114867	0.849	0.365	0.29525	0	1	2	2	2
4	8	504.762	0.339835	13.1028	0.34239	3.4848	30	0.0178302	0.136698	0.852	0.425	0.169705	0	1	3	3	2
5	8	398.544	0.41474	14.2618	0.93112	4.5123	51	0.0326187	0.180658	0.819	0.406	0.140786	0	1	3	2	2
10	8	535.628	0.35262	15.9394	0.93683	5.8496	59.5	0.0205366	0.162426	0.897	0.313	0.138894	0	1	2	3	2
12	8	444.152	0.313911	10.4096	0.51229	4.2425	38.9	0.0247663	0.139592	0.835	0.473	0.126862	0	1	3	3	3
14	8	371.441	0.414728	13.604	0.77081	4.786	43.9	0.0349988	0.174994	0.876	0.355	0.152415	0	1	3	4	3
15	8	364.833	0.418167	12.1448	0.69317	7.6225	36.8	0.0301508	0.175423	0.93	0.451	0.12211	0	1	2	4	2
16	8	410.697	0.366046	12.1448	0.77814	6.2561	48.2	0.0292186	0.141223	0.79	0.415	0.166593	0	1	2	4	3
17	8	375.657	0.392339	12.5572	0.65319	6.5952	63.4	0.02662	0.135762	0.914	0.37	0.182381	0.002662	1	3	3	3
18	8	384.299	0.3859	10.8985	0.65319	7.3818	14.3	0.0260214	0.18215	0.859	0.415	0.175747	0	1	1	3	2
19	8	467.782	0.32963	12.1478	0.39712	8.2581	48.3	0.0213775	0.0769589	0.8	0.486	0.169423	0	1	2	3	3
20	8	278.808	0.4261	16.43	0.54649	5.3062	53.8	0.0430404	0.240309	0.881	0.401	0.107568	0.0035867	1	4	4	3
24	8	356.95	0.327665	13.8924	0.94702	4.0544	55.9	0.0364197	0.235327	0.933	0.42	0.147507	0	1	4	3	2
25	8	369.415	0.346383	11.0464	0.68614	6.8938	23.7	0.0297768	0.213852	0.856	0.359	0.140444	0	1	2	4	3
27	8	401.326	0.427929	12.0954	0.46697	6.1197	35.6	0.0323926	0.151996	0.834	0.448	0.185899	0	1	2	3	1
28	8	430	0.315074	15.9674	0.68491	4.0544	27.1	0.027907	0.176744	0.766	0.374	0.202577	0	1	4	3	4
29	8	454.966	0.372804	9.9634	0.56628	3.9138	4.42	0.0219797	0.101106	0.774	0.42	0.164904	0.002198	1	2	2	3
31	8	266.667	0.412361	10.861	0.61368	6.7079	43	0.0412499	0.24	0.968	0.383	0.174162	0	1	1	4	1
32	8	359.35	0.378355	11.7044	1.00783	9.9104	39.6	0.0333936	0.239321	0.859	0.402	0.123186	0	1	2	3	3
33	8	381.875	0.276771	10.6266	0.58651	3.0499	16.2	0.0209493	0.0759411	0.69	0.531	0.166949	0	1	2	2	2
34	8	248.509	0.454929	9.7468	0.50786	16.1211	31.2	0.044264	0.269608	0.844	0.476	0.170764	0	1	3	3	3
36	8	390.728	0.420226	11.0504	0.52954	9.8013	28	0.0255933	0.133085	0.776	0.421	0.176062	0	1	2	2	3
37	8	363.221	0.389121	13.7856	0.75209	9.1796	36	0.0302846	0.126645	0.84	0.424	0.126157	0	1	2	3	2
39	8	427.588	0.308112	14.4144	0.96411	5.5708	39	0.0280644	0.142661	0.827	0.445	0.146832	0	1	2	3	3
40	8	451.102	0.308125	15.418	0.77263	9.6901	16.6	0.0243847	0.128574	0.822	0.431	0.185952	0	1	2	3	2
41	8	357.496	0.368966	12.0594	0.49532	6.0417	37.9	0.0279723	0.128673	0.789	0.437	0.142054	0	1	2	3	2
42	8	375.115	0.338371	14.5534	0.72127	2.5511	41.9	0.0293243	0.151953	0.874	0.369	0.15567	0.0026658	1	3	3	3
43	8	405.344	0.312781	15.576	0.72533	15.4126	9.14	0.0246704	0.155424	0.829	0.329	0.168932	0	1	3	3	3
46	8	487.8	0.305902	14.1994	0.90038	6.8399	41.9	0.0205002	0.098401	0.88	0.425	0.163052	0	1	3	2	2
47	8	364.098	0.410041	16.1916	0.77808	3.6134	13.8	0.0357047	0.233454	0.864	0.454	0.131445	0	1	3	3	2
49	8	473.334	0.366686	18.0364	0.56359	4.4944	62.6	0.0190141	0.101408	0.839	0.403	0.155387	0	1	3	2	3
50	8	383.735	0.354906	12.1378	0.51733	3.1978	17.8	0.0286656	0.13551	0.847	0.477	0.1867	0	1	2	3	3
51	8	385.595	0.371584	13.7074	0.56409	3.5591	26.1	0.0311207	0.150417	0.818	0.474	0.115295	0	1	2	3	3
54	8	424.054	0.298898	15.1698	0.31286	7.2492	52.3	0.0282983	0.191013	0.853	0.406	0.155123	0	1	2	4	2
56	8	576.301	0.331599	15.7996	0.63518	5.9859	156	0.017352	0.0989066	0.831	0.38	0.18894	0	1	4	2	4
57	8	436.65	0.38628	11.1714	0.77939	11.8511	59.7	0.0251918	0.164892	0.787	0.375	0.165349	0	1	2	3	3
59	8	488.295	0.409443	11.778	1.06945	8.8901	52	0.0266233	0.133116	0.841	0.484	0.162001	0	1	2	4	3
60	8	458.425	0.344255	14.7256	0.68028	3.8756	84.1	0.0261766	0.165785	0.791	0.462	0.184563	0	1	4	3	3
62	8	451.765	0.303388	9.725	2.51811	3.321	28.5	0.0221354	0.159375	0.843	0.389	0.158118	0	1	3	4	2
63	8	471.236	0.332975	11.8186	0.60898	9.8824	36.6	0.0212208	0.116714	0.833	0.501	0.167661	0	1	3	4	2
64	8	411.964	0.374741	11.111	0.522	10.064	43.6	0.024274	0.135934	0.853	0.481	0.139695	0	1	3	4	2
65	8	399.392	0.345853	14.4772	0.65845	6.0832	93.4	0.0250381	0.137709	0.839	0.425	0.159959	0	1	2	3	3
68	8	402.667	0.337847	14.9364	0.66628	4.821	37	0.0298013	0.191225	0.811	0.433	0.154683	0	1	1	4	2
72	8	478.52	0.389233	13.7608	0.58297	4.443	68.3	0.0250773	0.154643	0.867	0.443	0.138798	0	1	1	2	2
73	8	406.494	0.33106	15.4852	0.79053	4.5662	77.9	0.0246006	0.145144	0.916	0.469	0.134585	0	1	2	3	2
74	8	418.25	0.327589	15.8336	0.75432	10.784	80.5	0.0334728	0.196055	0.805	0.453	0.140711	0	1	2	3	3
76	8	462.002	0.256014	12.6512	0.6155	8.2824	54.2	0.0216449	0.155843	0.838	0.365	0.141026	0	1	2	3	2
77	8	475.292	0.315696	13.1794	0.79797	11.4374	36.7	0.0231437	0.128342	0.882	0.431	0.152147	0	1	3	3	3
78	8	380.467	0.285883	14.3212	0.5711	5.9141	28.5	0.0289118	0.162958	0.797	0.425	0.124689	0.0026283	1	3	3	3
79	8	438.93	0.30516	15.6318	0.68447	9.287	58.3	0.0273392	0.145809	0.837	0.463	0.116393	0	1	2	4	3
80	8	555.314	0.234395	15.9895	0.45268	3.9103	75	0.0234102	0.127856	0.785	0.495	0.125787	0	1	2	3	3
81	8	463.281	0.335207	14.744	0.60248	6.1686	82.5	0.0259022	0.107926	0.795	0.468	0.187854	0	1	2	2	3
82	8	401.431	0.300597	13.5596	0.73662	8.3975	35.9	0.0298931	0.154447	0.822	0.406	0.138694	0	1	1	2	3
84	8	445.294	0.373948	13.5664	0.51652	3.9548	56.5	0.0224571	0.0965654	0.83	0.445	0.143292	0	1	2	4	3
85	8	335.236	0.382536	14.5318	0.61987	6.6101	40.4	0.0387787	0.223723	0.866	0.42	0.149595	0	1	2	3	3
87	8	442.642	0.303347	12.8282	0.58415	4.0113	13.7	0.0293691	0.16266	0.85	0.469	0.159951	0	1	3	2	4
88	8	476.217	0.398396	13.5564	0.82033	5.1951	35.3	0.0251986	0.109194	0.795	0.55	0.149033	0.0020999	1	2	3	3
93	8	371.621	0.286897	12.748	0.66339	5.8459	10.8	0.0296	0.0995638	0.823	0.461	0.196781	0	1	2	4	3
94	8	370.088	0.380912	13.6858	0.43912	4.686	34.4	0.0270206	0.116189	0.794	0.494	0.132665	0	1	2	2	2
96	8	466.771	0.325018	13.8222	0.76061	5.809	9.96	0.0299933	0.182102	0.819	0.371	0.198339	0	1	2	2	3
97	8	428.296	0.367643	14.4456	0.64341	4.2171	40.2	0.0210135	0.142425	0.823	0.377	0.113076	0	1	3	2	2
100	8	419.655	0.268933	34.5338	0.82499	6.4601	28.3	0.0333607	0.162038	0.808	0.442	0.123602	0	1	2	4	2
102	8	545.087	0.321662	14.067	0.66249	5.5487	31.1	0.0220148	0.115578	0.817	0.417	0.24645	0	1	2	2	2
103	8	344.718	0.375991	12.9696	0.74842	4.7843	20.2	0.0406129	0.243677	0.795	0.454	0.109917	0	1	1	3	3
AB019	9	474.107	0.377586	11.9536	0.74145	11.8196	49.9	0.0232015	0.240452	0.827	0.399	0.169082	0	1	3	3	3
AB020	9	351.866	0.389751	13.7197	0.9105	0.0081	20.2	0.0312619	0.255779	0.853	0.38	0.126196	0	1	1	4	2
AB001	9	366.06	0.354513	12.6813	0.48467	4.9065	20.3	0.0300497	0.199421	0.857	0.452	0.15408	0	1	1	2	2
AB002	9	387.337	0.386426	12.0518	0.79882	9.8766	33.5	0.0232356	0.198793	0.88	0.375	0.178245	0	1	1	3	3
AB003	9	352.951	0.361994	13.1058	0.78984	7.0998	50.7	0.0283325	0.178495	0.836	0.43	0.164676	0	1	3	3	3
AB004	9	390.909	0.328133	14.7608	0.64417	3.5351	24.9	0.0255814	0.199535	0.862	0.397	0.132674	0	1	2	4	2
AB005	9	406.383	0.423782	10.209	0.71153	4.0775	56.9	0.0295288	0.23623	0.86	0.431	0.143855	0	1	2	4	2
AB006	9	443.135	0.320629	18.1765	0.581	4.1757	0.893	0.0270798	0.200842	0.8622	0.405	0.168645	0	1	1	2	2
AB007	9	418.096	0.243277	13.9525	0.68115	5.1549	7.98	0.0263097	0.217653	0.858	0.38	0.1602	0	1	2	3	3
AB008	9	357.543	0.402055	16.6643	0.5311	4.05	44.36	0.0251718	0.181796	0.83	0.53	0.118447	0	1	1	4	2
AB009	9	388.329	0.274579	14.4995	0.7148	7.2008	43.6	0.0309016	0.221462	0.879	0.517	0.12661	0	1	1	4	2
AB010	9	405.929	0.324473	15.7963	0.53796	6.5165	70	0.0295618	0.221714	0.799	0.484	0.152621	0	1	2	3	2
AB011	9	404.765	0.351648	10.8768	0.62453	1.0467	56.9	0.0271763	0.242116	0.882	0.427	0.133699	0	1	3	3	3
AB012	9	428.319	0.328538	17.7403	0.8711	5.5949	98.7	0.0303512	0.268491	0.837	0.44	0.178774	0	1	1	3	2
AB013	9	334.615	0.34884	11.1368	0.77409	7.1153	47.3	0.0298851	0.239081	0.893	0.503	0.174058	0	1	1	3	2
AB014	9	363.475	0.348624	15.2025	1.05759	3.104	65.8	0.024761	0.211844	0.824	0.463	0.159773	0	1	4	3	3
AB015	9	460.49	0.313353	20.2065	0.58333	3.4111	3.47	0.0304024	0.262764	0.862	0.405	0.178642	0	1	3	3	3
AB016	9	375.214	0.289869	12.2415	0.59677	4.1844	28	0.0266515	0.231868	0.81	0.499	0.174862	0	1	3	4	3
AB017	9	393.592	0.362683	15.4954	0.63537	9.4075	8.1	0.0279477	0.246448	0.86	0.43	0.156427	0	1	2	3	3
AB018	9	412.975	0.368872	13.5448	0.72684	6.291	66	0.0242145	0.220352	0.836	0.427	0.13966	0	1	2	3	3
Holotype E. williamsoni	10	480	0.271377	9.5863	0.60894	6.0352	42.1	0.0270833	0.210417	0.8908	0.53	0.122536	0	1	3	4	2
